# Supplementary material
Source: Elsevier journal article supplement (https://www.sciencedirect.com/science/article/pii/S2255553618302167)
Supplement: mmc1 [file S2255553618302167:mmc1.docx]

JPED_2018-274_Material Suplementar

**Figura suplementar 1 - Percentagem de relatos de reações graves e mortes por suspeita de eventos adversos à medicamentos por idade com linha de tendência (n = 3330, Brasil: 2008-2013).**

**
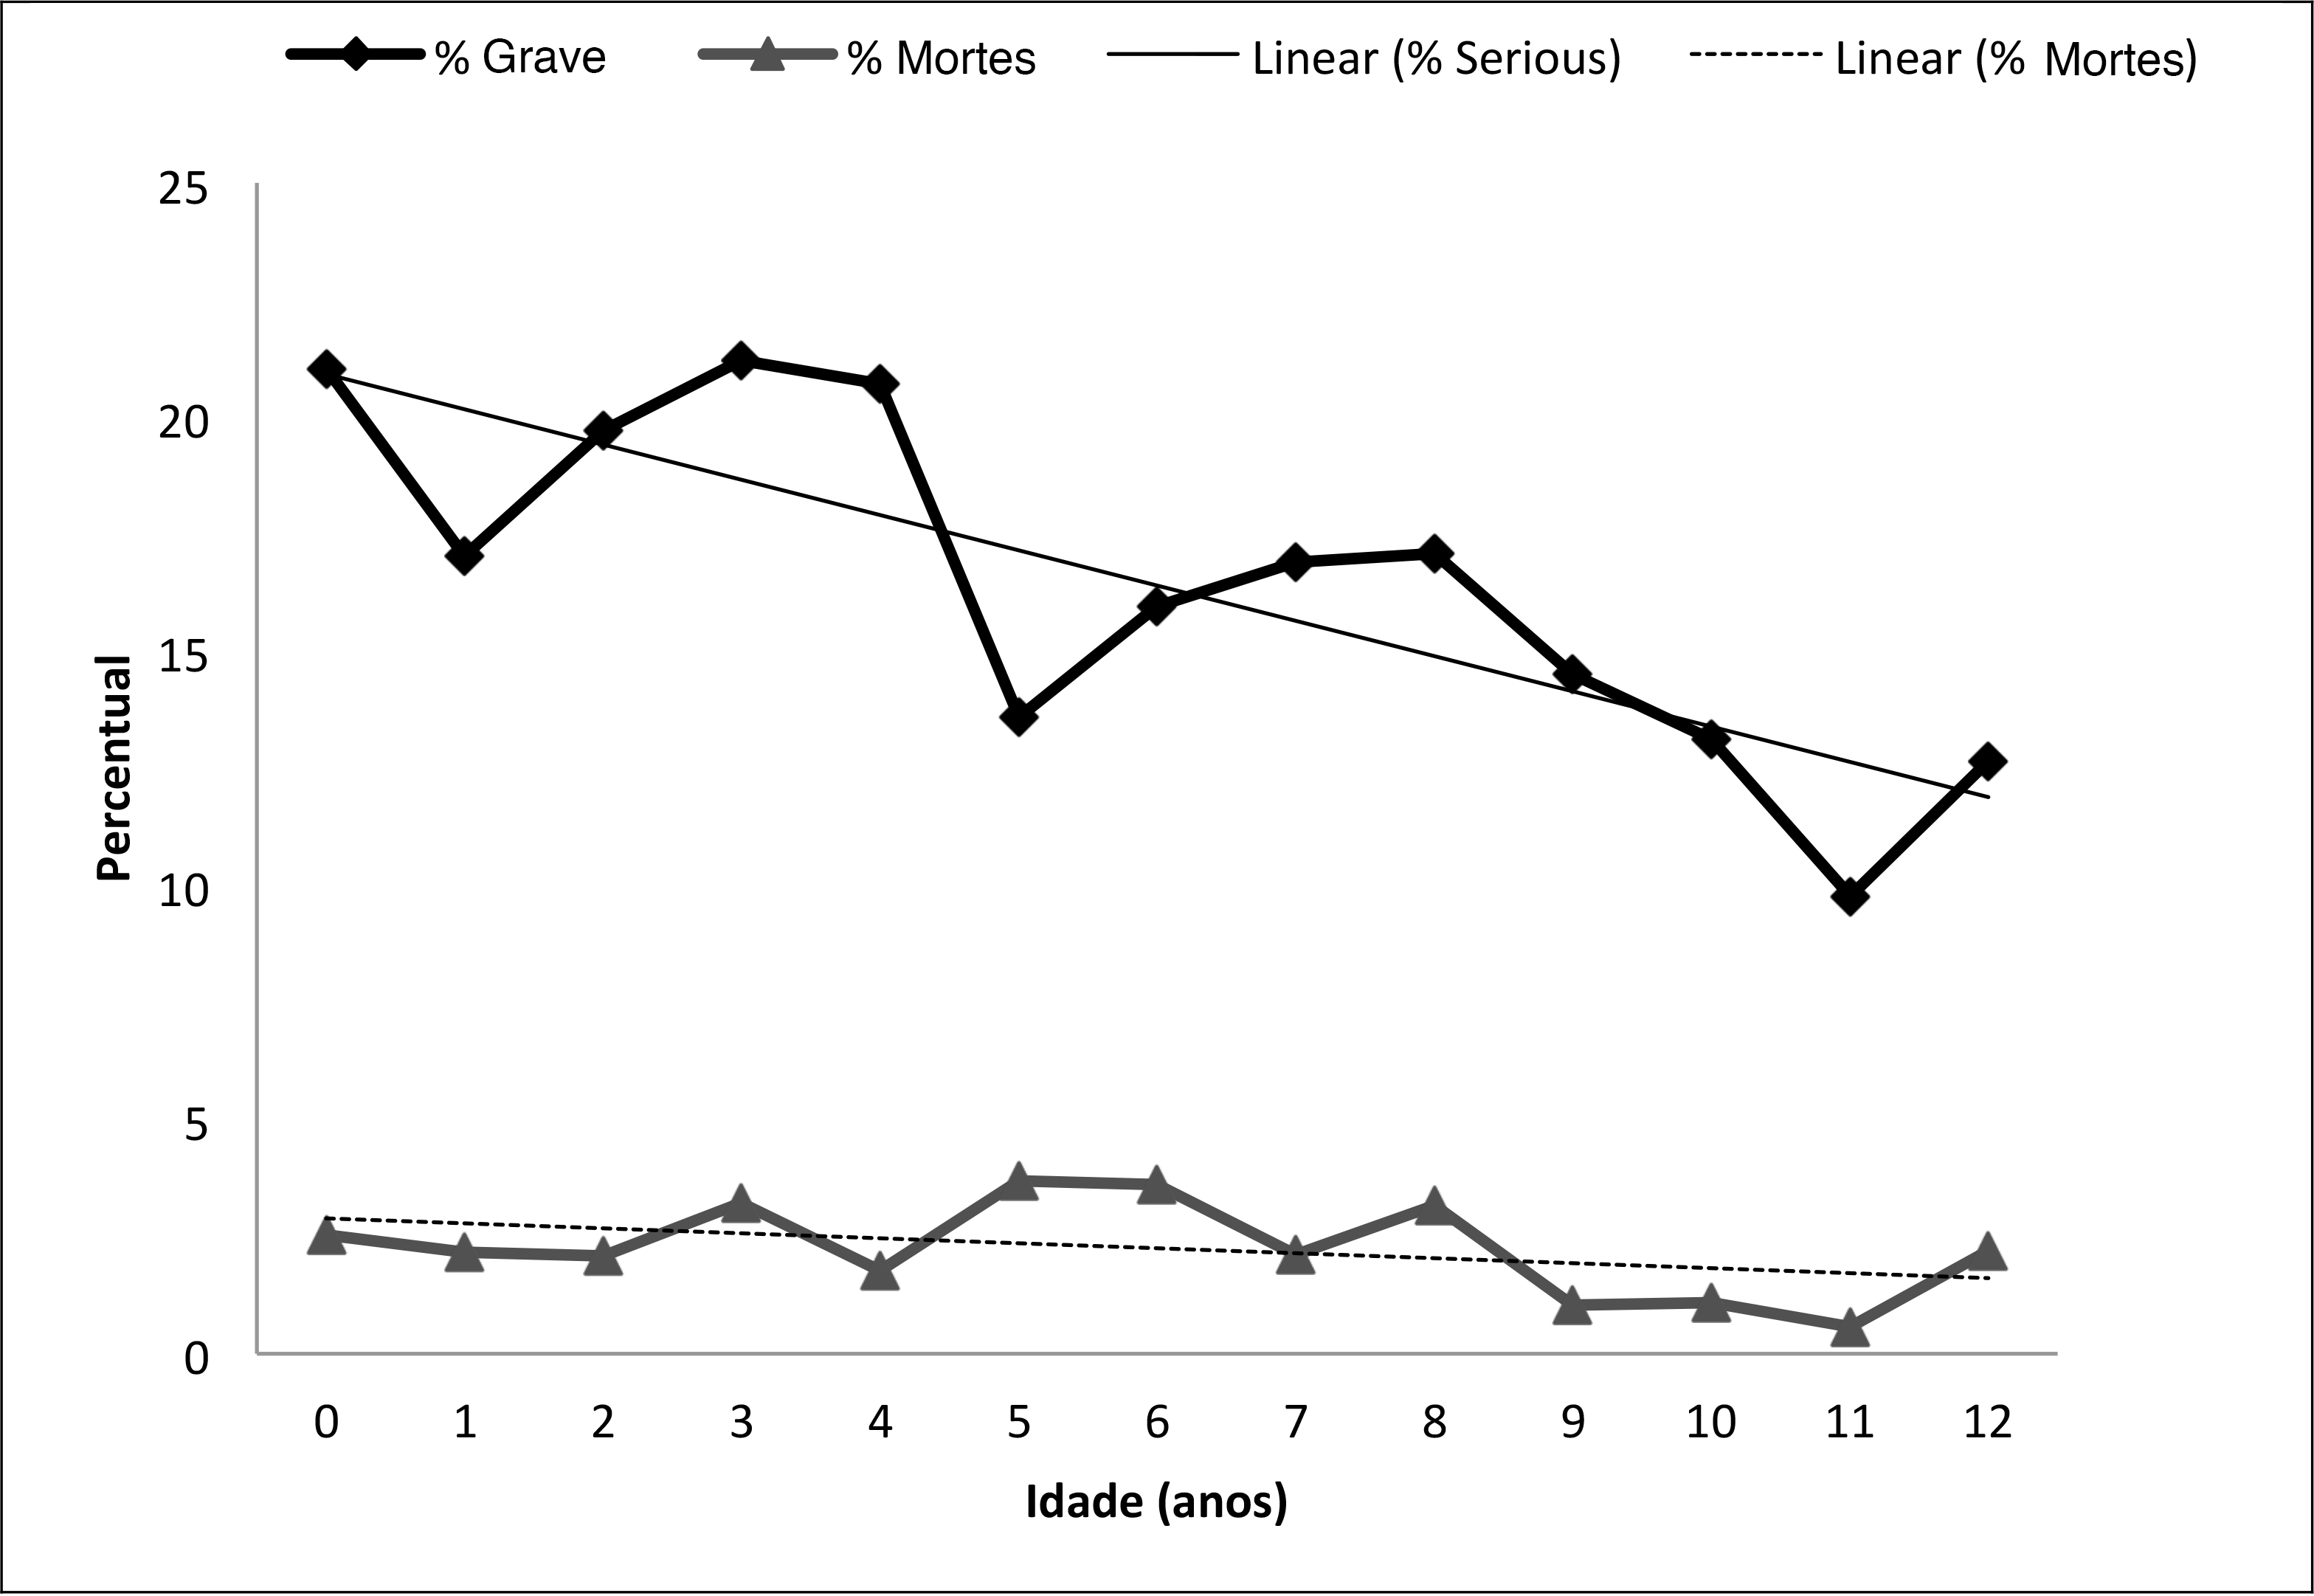
**

Fonte: Notivisa / Anvisa.
