# Supplementary material
Source: Elsevier journal article supplement (https://www.sciencedirect.com/science/article/pii/S2255553618302167)
Supplement: mmc2 [file S2255553618302167:mmc2.docx]

**Tabela suplementar 1 - Distribuição por Região de relatos de suspeita de RAM (Brasil, 2008-2013)**

| **Região** | **%** |
| --- | --- |
| Norte | 11,5 |
| Nordeste | 23,5 |
| Sul | 24,5 |
| Sudeste | 39 |
| Centro-Oeste | 1,5 |

RAM, Reação adversa a medicamento.

**Tabela suplementar 2 - Principais tipos de suspeitas de RAM relatadas em crianças de 0 a 12 anos de acordo com o WHO-Art Code (Brasil, 2008-2013)**

| **WHO-Art Code** | **Descrição** | **n** |
| --- | --- | --- |
| 24001 | Prurido | 368 |
| 27001 | Erupção cutânea | 334 |
| 28003 | Eritema | 182 |
| 228001 | Vômito | 170 |
| 44001 | Urticária | 168 |
| 225003 | Hiperemia | 164 |
| 725001 | Febre | 120 |
| 28006 | Exantema | 105 |
| 712001 | Reação alérgica | 96 |
| 205001 | Diarreia | 82 |
| 224001 | Taquicardia | 82 |
| 308001 | Náusea | 78 |
| 207001 | Enrubescimento | 63 |
| 207003 | Hiperemia da pele | 63 |
| 238005 | Secreção ocular anormal | 61 |
| 514001 | Dispneia | 60 |
| 398001 | Edema | 54 |

RAM, Reação adversa a medicamento.

Fonte: Notivisa/Anvisa.
